# Supplementary material
Source: publisher figshare collection journal article supplement (https://gsajournals.figshare.com/ndownloader/files/16356626)
Supplement: Supplementary file 1 [file 16356626]

## Sheet: Sheet1
Table S1. Gene-locus interactions that are associated with yeast cell growth in response to Rapamycin
Gene			SNP						Criteria		Functional annotations
Gene	Alias	Chr	Name	Position	GWAS score (-log P-value)	Relevant genes	Module	Fraction	I	II	Ribosome biogenesis*	Reproduction*	Rapamycine resistance**	Effect on vegetative growth**
ZIP2	YGL249W	7	YDR351W	Chr 4: 1181160	0.512187	MRP1, MRPS28, FCF1	Y1	0.0990099		+
RBG2	YGR173W	7	NDR132C	Chr 4: 1149761	0.615448			0.214953		+
ALB1	YJL122W	10	NDR132C	Chr 4: 1149761	0.615448			0.575758	+	+	+			+
NOP2	YNL061W	14	NDR132C	Chr 4: 1149761	0.615448			0.330189		+	+			+
NOC3	YLR002C	12	NDR132C	Chr 4: 1149761	0.615448			0.252252		+	+			+
IMP4	YNL075W	14	NDR132C	Chr 4: 1149761	0.615448			0.443478		+	+
PUF6	YDR496C	4	NDR132C	Chr 4: 1149761	0.615448			0.363636		+	+		+
ZPR1	YGR211W	7	NDR132C	Chr 4: 1149761	0.615448			0.181818	+				+
UTP14	YML093W	13	NDR132C	Chr 4: 1149761	0.615448			0.355769	+		+			+
UTP23	YOR004W	15	NDR132C	Chr 4: 1149761	0.615448			0.301075	+		+			+
ARO9	YHR137W	8	NDR132C	Chr 4: 1149761	0.615448			0.445545	+
NOP1	YDL014W	4	NDR132C	Chr 4: 1149761	0.615448			0.245455	+		+			+
RRS1	YOR294W	15	NDR132C	Chr 4: 1149761	0.615448			0.349057	+		+
DAL2	YIR029W	9	YDR351W	Chr 4: 1181160	0.512187			0.258621	+
NOG2	YNR053C	14	NDR132C	Chr 4: 1149761	0.615448			0.340659	+		+
ERB1	YMR049C	13	NDR132C	Chr 4: 1149761	0.615448			0.5	+		+			+
MLS1	YNL117W	14	YDR351W	Chr 4: 1181160	0.512187			0.463158	+
ESBP6	YNL125C	14	YDR335W	Chr 4: 1144476	0.512187			0.396226	+					+
DCG1	YIR030C	9	YDR335W	Chr 4: 1144476	0.512187			0.254902		+
DIP2	YLR129W	12	NDR132C	Chr 4: 1149761	0.615448			0.183673	+		+
MF(ALPHA)2	YGL089C	7	YFL026W	Chr 6: 83559	0.578848	STE2, GYP8,BST1, BUD27	Y2	0.267241		+		+
HMLALPHA1	YCL066W	3	YFL026W	Chr 6: 83559	0.578848			0.16092		+		+
MFA2	YNL145W	14	NGR056C	Chr 7: 708237	0.97912	CLB6, SHY1	Y3	0.234694		+		+
BAR1	YIL015W	9	NGR056C	Chr 7: 708237	0.97912			0.236842		+		+		+
MFA1	YDR461W	4	YNL214W	Chr 14: 61469	0.896994	YPT11	Y4	0.182692		+		+
STE3	YKL178C	11	YNL214W	Chr 14: 61469	0.896994			0.189655		+		+	+
ZPS1	YOL154W	15	YOR329C	Chr 15: 937036	0.133625		Y5	0.287037		+
HSH49	YOR319W	15	YOR329C	Chr 15: 937036	0.133625			0.291139	+
RGI1	YER067W	5	YOL088C	Chr 15: 154309	0.533324		Y6	0.19469		+				+
NDJ1	YOL104C	15	YOL094C	Chr 15: 154309	0.533324			0.237624	+			+
MUP1	YGR055W	7	YBR162W	Chr 2: 565216	0.705021		Y7	0.172727		+			+
ASG7	YJL170C	10	YFL026W	Chr 6: 5152	1.81841		Y8	0.18		+		+
LEU2	YCL018W	3	NNL038C	Chr 14 : 412269	2.23584		Y9	0.173469		+
NEJ1	YLR265C	12	YLR267W	Chr 12: 679808	0.624546		Y10	0.441441	+
ESF1	YDR365C	4	YDR367W	Chr 4: 1213416	0.510034		Y11	0.394495	+		+
Table S1. Gene-SNP pairs that are associated with yeast cell growth in response to Rapamycin. For each identified gene (columns 1-3), the table reports its interacting SNP (columns 4-5) together with its GWAS score (column 6), the relevant genes within this genomic locus (column 7), the SNP's module identifier (column 8), and its locus score (column 9). The criteria by which the genes were chosen…
